# Supplementary material
Source: Springer Nature journal article supplement (https://www.springermedizin.de/resource/supplementary/12911_2011_447_MOESM1_ESM.pdf/9525766)
Supplement: MOESM1 [file 9525766]

| Primary care practice sites | Trial participation | Number of clinicians | Ave office visits per day | Location | Ownership     | Residency | EMR           | PHR      |
|-----------------------------|---------------------|----------------------|---------------------------|----------|---------------|-----------|---------------|----------|
| Practice #1                 | E, A                | 42                   | 223                       | Suburban | Independent   | Y         | Enterprise™   | Intuit™  |
| Practice #2                 | E, A                | 4                    | 72                        | Suburban | Independent   | N         | Enterprise™   | Intuit™  |
| Practice #3                 | E, A                | 10                   | 189                       | Suburban | Independent   | N         | Enterprise™   | Intuit™  |
| Practice #4                 | E, A                | 2                    | 39                        | Suburban | Independent   | N         | Enterprise™   | Intuit™  |
| Practice #5                 | E, A                | 9                    | 172                       | Suburban | Independent   | N         | Enterprise™   | Intuit™  |
| Practice #6                 | E, A                | 2                    | 40                        | Suburban | Independent   | N         | Enterprise™   | Intuit™  |
| Practice #7                 | E, A                | 6                    | 97                        | Suburban | Independent   | N         | Enterprise™   | Intuit™  |
| Practice #8                 | E, A                | 12                   | 168                       | Suburban | Independent   | N         | Enterprise™   | Intuit™  |
| Practice #9                 | D                   | 7                    | 123                       | Rural    | Independent   | N         | Professional™ | None     |
| Practice #10                | D                   | 23                   | 70                        | Rural    | Health system | Y         | Professional™ | None     |
| Practice #11                | D                   | 9                    | 241                       | Suburban | Independent   | N         | Professional™ | Intuit™  |
| Practice #12                | D                   | 5                    | 89                        | Urban    | Health system | N         | Epic™         | MyChart™ |
| Practice #13                | D                   | 3                    | 49                        | Urban    | Health system | N         | Epic™         | MyChart™ |
| Practice #14                | D                   | 3                    | 56                        | Suburban | Health system | N         | Epic™         | MyChart™ |
